# Supplementary material for: The Effect of Medicare Part D on Drug and Medical Spending
Source: Atypon-hosted journal article supplement (doi:10.1056/nejmsa0807998), 2009-07-01
Supplement: nejm_zhang_52sa1.pdf [file nejm_zhang_52sa1.pdf]

## Supplementary Appendix

This appendix has been provided by the authors to give readers additional information about their work.

Supplement to: Zhang Y, Donohue JM, Lave JR, O'Donnell G, Newhouse JP. The effect of Medicare Part D on drug and medical spending. *N Engl J Med* 2009;361:52-61.

## Appendix Tables

### Coefficients and Confidence Intervals Used to Calculate Impact of Part D on Total Monthly Pharmacy Spending, Lipid Lowering and Anti-Diabetic Medication Use, and Non-Drug Medical Spending

Table A1: The impact of Part D on overall pharmacy spending

| Comparing No Coverage and No Cap Groups                                       | No Cap |        |       | No Coverage |        |       | No Coverage vs No Cap |             |             |
|-------------------------------------------------------------------------------|--------|--------|-------|-------------|--------|-------|-----------------------|-------------|-------------|
|                                                                               | No Cap | 95% CI | 172.0 | Coverage    | 95% CI | 49.4  | No Cap                | 95% CI      | 172.0       |
| Estimated expenditure level in Jan 04                                         | 165.3  | 158.6  | 172.0 | 46.3        | 43.2   | 49.4  | -119.1                | -115.5      | -122.7      |
| Estimated rate of change in expenditures during 2004-2005                     | 0.4    | 0.3    | 0.5   | 0.4         | 0.3    | 0.5   | 0.0                   | 0.0         | 0.0         |
| Estimated expenditure level in Dec 05                                         | 174.9  | 165.1  | 184.7 | 55.8        | 49.7   | 62.0  | -119.1                | -115.5      | -122.7      |
| Estimated change in expenditures between Dec 05 and Jan 06                    |        |        |       | 17.0        | 8.8    | 25.2  | 17.0                  | 8.8         | 25.2        |
| Estimated rate of change in expenditures during 2006                          | 0.4    | 0.3    | 0.5   | 2.2         | 1.1    | 3.2   | 1.8                   | 0.8         | 2.7         |
| Estimated rate of change in expenditures during 2007                          | 0.4    | 0.3    | 0.5   | 0.7         | -1.9   | 3.2   | 0.3                   | -2.2        | 2.7         |
| Estimated expenditure level in Dec 07                                         | 184.5  | 171.6  | 197.3 | 101.7       | 45.4   | 158.1 | -82.7                 | -126.2      | -39.2       |
| Comparison of annual change in expenditures between 12/05-12/06 vs 1/04-12/05 | 4.8    | 3.2    | 6.3   | 42.9        | 22.2   | 63.6  | 38.1                  | 19.0        | 57.3        |
| Comparison of annual change in expenditures between 12/06-12/07 vs 1/04-12/05 | 4.8    | 3.2    | 6.3   | 7.8         | -23.2  | 38.8  | 3.0                   | -26.4       | 32.5        |
| Difference between two groups in spending changes pre- and post- Part D       |        |        |       |             |        |       | <b>41.1</b>           | <b>32.7</b> | <b>49.6</b> |

| Comparing \$150 and No Cap Groups                                             | No Cap |        |       | \$150 Cap |        |       | \$150 vs No Cap |             |             |
|-------------------------------------------------------------------------------|--------|--------|-------|-----------|--------|-------|-----------------|-------------|-------------|
|                                                                               | No Cap | 95% CI | 175.0 | Cap       | 95% CI | 94.2  | Cap             | 95% CI      | 175.0       |
| Estimated expenditure level in Jan 04                                         | 169.5  | 163.9  | 175.0 | 91.6      | 89.0   | 94.2  | -77.8           | -74.8       | -80.8       |
| Estimated rate of change in expenditures during 2004-2005                     | 0.4    | 0.3    | 0.5   | 0.4       | 0.3    | 0.5   | 0.0             | 0.0         | 0.0         |
| Estimated expenditure level in Dec 05                                         | 178.8  | 170.6  | 186.9 | 100.9     | 95.8   | 106.1 | -77.8           | -74.8       | -80.8       |
| Estimated change in expenditures between Dec 05 and Jan 06                    |        |        |       | 7.7       | 0.7    | 14.6  | 7.7             | 0.7         | 14.6        |
| Estimated rate of change in expenditures during 2006                          | 0.4    | 0.3    | 0.5   | 2.0       | 1.1    | 2.8   | 1.6             | 0.8         | 2.3         |
| Estimated rate of change in expenditures during 2007                          | 0.4    | 0.3    | 0.5   | 0.4       | -1.7   | 2.6   | 0.1             | -2.0        | 2.1         |
| Estimated expenditure level in Dec 07                                         | 188.1  | 177.4  | 198.8 | 132.8     | 85.2   | 180.4 | -55.3           | -92.1       | -18.4       |
| Comparison of annual change in expenditures between 12/05-12/06 vs 1/04-12/05 | 4.7    | 3.4    | 5.9   | 31.1      | 13.6   | 48.6  | 26.5            | 10.3        | 42.7        |
| Comparison of annual change in expenditures between 12/06-12/07 vs 1/04-12/05 | 4.7    | 3.4    | 5.9   | 5.4       | -20.8  | 31.6  | 0.7             | -24.2       | 25.6        |
| Difference between two groups in spending changes pre- and post- Part D       |        |        |       |           |        |       | <b>27.2</b>     | <b>20.1</b> | <b>34.3</b> |

| Comparing \$350 and No Cap Groups                                             | No Cap |        |       | \$350 Cap |        |       | \$350 vs No Cap |             |              |
|-------------------------------------------------------------------------------|--------|--------|-------|-----------|--------|-------|-----------------|-------------|--------------|
|                                                                               | No Cap | 95% CI | 177.5 | Cap       | 95% CI | 112.6 | Cap             | 95% CI      | 177.5        |
| Estimated expenditure level in Jan 04                                         | 170.5  | 163.6  | 177.5 | 109.4     | 106.1  | 112.6 | -61.2           | -57.5       | -64.9        |
| Estimated rate of change in expenditures during 2004-2005                     | 0.4    | 0.2    | 0.5   | 0.4       | 0.2    | 0.5   | 0.0             | 0.0         | 0.0          |
| Estimated expenditure level in Dec 05                                         | 179.1  | 169.0  | 189.3 | 117.9     | 111.5  | 124.4 | -61.2           | -57.5       | -64.9        |
| Estimated change in expenditures between Dec 05 and Jan 06                    |        |        |       | 10.34     | 1.66   | 19.03 | 10.34           | 1.66        | 19.03        |
| Estimated rate of change in expenditures during 2006                          | 0.4    | 0.2    | 0.5   | 0.71      | -0.39  | 1.80  | 0.35            | -0.61       | 1.31         |
| Estimated rate of change in expenditures during 2007                          | 0.4    | 0.2    | 0.5   | 0.21      | -2.51  | 2.94  | -0.14           | -2.73       | 2.44         |
| Estimated expenditure level in Dec 07                                         | 187.7  | 174.4  | 201.0 | 135.0     | 75.7   | 194.3 | -52.7           | -98.7       | -6.7         |
| Comparison of annual change in expenditures between 12/05-12/06 vs 1/04-12/05 | 4.3    | 2.7    | 5.9   | 18.8      | -3.0   | 40.6  | 14.5            | 7.6         | 21.4         |
| Comparison of annual change in expenditures between 12/06-12/07 vs 1/04-12/05 | 4.3    | 2.7    | 5.9   | 2.6       | -30.1  | 35.2  | -1.7            | -3.4        | -0.1         |
| Difference between two groups in spending changes pre- and post- Part D       |        |        |       |           |        |       | <b>12.8</b>     | <b>3.87</b> | <b>21.69</b> |

We tested for and found first-order serial correlation in the three comparisons: No Coverage:  $\rho = 0.34$  (p-value=0.03); \$150 cap:  $\rho = -0.41$  (p-value=0.006); \$350 cap:  $\rho = -0.50$  (p-value=0.005).

Given these results we used the SAS software to adjust for this serial correlation and used the resulting “model-based” standard errors.

Table A2: The impact of Part D on counts of monthly lipid-lowering medications

| Comparing No Coverage and No Cap Groups                                       | No Cap |        |       | No Coverage |        |      | No Coverage vs No Cap |             |             |
|-------------------------------------------------------------------------------|--------|--------|-------|-------------|--------|------|-----------------------|-------------|-------------|
|                                                                               | No Cap | 95% CI | 0.00  | Coverage    | 95% CI | 0.00 | No Cap                | 95% CI      | 0.00        |
| Estimated expenditure level in Jan 04                                         | 0.00   | 0.00   | 0.00  | 0.50        | 0.00   | 0.00 | 0.50                  | 0.00        | 0.00        |
| Estimated rate of change in expenditures during 2004-2005                     | 0.00   | 0.00   | 0.00  | 0.00        | -0.06  | 0.06 | 0.00                  | -0.05       | 0.06        |
| Estimated expenditure level in Dec 05                                         | -0.03  | -0.05  | -0.01 | 0.47        | -1.36  | 1.40 | 0.50                  | -1.31       | 1.41        |
| Estimated change in expenditures between Dec 05 and Jan 06                    |        |        |       | 0.00        | -0.06  | 0.06 | 0.00                  | -0.06       | 0.06        |
| Estimated rate of change in expenditures during 2006                          | 0.00   | 0.00   | 0.00  | 0.01        | -0.05  | 0.08 | 0.01                  | -0.05       | 0.08        |
| Estimated rate of change in expenditures during 2007                          | 0.00   | 0.00   | 0.00  | 0.00        | -0.07  | 0.08 | 0.00                  | -0.07       | 0.08        |
| Estimated expenditure level in Dec 07                                         | -0.06  | -0.11  | -0.02 | 0.66        | -2.18  | 2.66 | 0.73                  | -2.07       | 2.67        |
| Comparison of annual change in expenditures between 12/05-12/06 vs 1/04-12/05 | -0.02  | -0.03  | 0.00  | 0.15        | -0.66  | 1.00 | 0.16                  | -0.63       | 1.00        |
| Comparison of annual change in expenditures between 12/06-12/07 vs 1/04-12/05 | -0.02  | -0.03  | 0.00  | 0.03        | -0.84  | 0.96 | 0.05                  | -0.82       | 0.96        |
| Difference between two groups in spending changes pre- and post- Part D       |        |        |       |             |        |      | <b>0.21</b>           | <b>0.15</b> | <b>0.27</b> |

| Comparing \$150 and No Cap Groups                                             | No Cap |        |      | \$150 Cap |        |      | \$150 vs No Cap |             |             |
|-------------------------------------------------------------------------------|--------|--------|------|-----------|--------|------|-----------------|-------------|-------------|
|                                                                               | No Cap | 95% CI | 0.90 | Coverage  | 95% CI | 0.62 | No Cap          | 95% CI      | 0.00        |
| Estimated expenditure level in Jan 04                                         | 0.86   | 0.82   | 0.90 | 0.60      | 0.59   | 0.62 | -0.25           | -0.23       | -0.27       |
| Estimated rate of change in expenditures during 2004-2005                     | 0.00   | 0.00   | 0.00 | 0.00      | 0.00   | 0.00 | 0.00            | 0.00        | 0.00        |
| Estimated expenditure level in Dec 05                                         | 0.83   | 0.77   | 0.89 | 0.58      | 0.54   | 0.61 | -0.25           | -0.23       | -0.27       |
| Estimated change in expenditures between Dec 05 and Jan 06                    |        |        |      | 0.03      | -0.01  | 0.08 | 0.03            | -0.01       | 0.08        |
| Estimated rate of change in expenditures during 2006                          | 0.00   | 0.00   | 0.00 | 0.01      | 0.00   | 0.01 | 0.01            | 0.00        | 0.01        |
| Estimated rate of change in expenditures during 2007                          | 0.00   | 0.00   | 0.00 | 0.00      | -0.01  | 0.02 | 0.00            | -0.01       | 0.02        |
| Estimated expenditure level in Dec 07                                         | 0.80   | 0.73   | 0.88 | 0.74      | 0.41   | 1.07 | -0.06           | -0.32       | 0.20        |
| Comparison of annual change in expenditures between 12/05-12/06 vs 1/04-12/05 | -0.01  | -0.02  | 0.00 | 0.11      | -0.01  | 0.23 | 0.12            | 0.01        | 0.24        |
| Comparison of annual change in expenditures between 12/06-12/07 vs 1/04-12/05 | -0.01  | -0.02  | 0.00 | 0.04      | -0.14  | 0.22 | 0.06            | -0.12       | 0.23        |
| Difference between two groups in spending changes pre- and post- Part D       |        |        |      |           |        |      | <b>0.18</b>     | <b>0.13</b> | <b>0.23</b> |

| Comparing \$350 and No Cap Groups                                             | No Cap |        |      | \$350 Cap |        |      | \$350 vs No Cap |             |             |
|-------------------------------------------------------------------------------|--------|--------|------|-----------|--------|------|-----------------|-------------|-------------|
|                                                                               | No Cap | 95% CI | 0.90 | Coverage  | 95% CI | 0.68 | No Cap          | 95% CI      | 0.00        |
| Estimated expenditure level in Jan 04                                         | 0.86   | 0.81   | 0.90 | 0.66      | 0.63   | 0.68 | -0.20           | -0.17       | -0.23       |
| Estimated rate of change in expenditures during 2004-2005                     | 0.00   | 0.00   | 0.00 | 0.00      | 0.00   | 0.00 | 0.00            | 0.00        | 0.00        |
| Estimated expenditure level in Dec 05                                         | 0.83   | 0.76   | 0.90 | 0.63      | 0.59   | 0.68 | -0.20           | -0.17       | -0.23       |
| Estimated change in expenditures between Dec 05 and Jan 06                    |        |        |      | 0.03      | -0.03  | 0.09 | 0.03            | -0.03       | 0.09        |
| Estimated rate of change in expenditures during 2006                          | 0.00   | 0.00   | 0.00 | 0.00      | -0.01  | 0.01 | 0.00            | 0.00        | 0.01        |
| Estimated rate of change in expenditures during 2007                          | 0.00   | 0.00   | 0.00 | 0.00      | -0.02  | 0.02 | 0.00            | -0.01       | 0.02        |
| Estimated expenditure level in Dec 07                                         | 0.81   | 0.71   | 0.90 | 0.73      | 0.31   | 1.15 | -0.08           | -0.40       | 0.25        |
| Comparison of annual change in expenditures between 12/05-12/06 vs 1/04-12/05 | -0.01  | -0.02  | 0.00 | 0.06      | -0.09  | 0.21 | 0.07            | 0.00        | 0.00        |
| Comparison of annual change in expenditures between 12/06-12/07 vs 1/04-12/05 | -0.01  | -0.02  | 0.00 | 0.03      | -0.20  | 0.26 | 0.04            | 0.00        | 0.00        |
| Difference between two groups in spending changes pre- and post- Part D       |        |        |      |           |        |      | <b>0.11</b>     | <b>0.05</b> | <b>0.17</b> |

Table A3: The impact of Part D on counts of monthly anti-diabetic medications

| Comparing No Coverage and No Cap Groups                                       | No Cap |        |        | No Coverage |        |        | No Coverage vs No Cap |             |             |
|-------------------------------------------------------------------------------|--------|--------|--------|-------------|--------|--------|-----------------------|-------------|-------------|
|                                                                               | No Cap | 95% CI | 95% CI | No Coverage | 95% CI | 95% CI | No Coverage vs No Cap | 95% CI      | 95% CI      |
| Estimated expenditure level in Jan 04                                         | 0.00   | 0.00   | 0.00   | 0.68        | 0.00   | 0.00   | 0.68                  | 0.00        | 0.00        |
| Estimated rate of change in expenditures during 2004-2005                     | 0.00   | 0.00   | 0.00   | 0.00        | 0.06   | 0.22   | 0.00                  | 0.07        | 0.22        |
| Estimated expenditure level in Dec 05                                         | -0.07  | -0.10  | -0.04  | 0.62        | 1.51   | 5.35   | 0.68                  | 1.61        | 5.38        |
| Estimated change in expenditures between Dec 05 and Jan 06                    |        |        |        | 0.14        | 0.06   | 0.22   | 0.14                  | 0.06        | 0.22        |
| Estimated rate of change in expenditures during 2006                          | 0.00   | 0.00   | 0.00   | 0.01        | 0.06   | 0.24   | 0.01                  | 0.07        | 0.24        |
| Estimated rate of change in expenditures during 2007                          | 0.00   | 0.00   | 0.00   | 0.00        | 0.04   | 0.25   | 0.00                  | 0.04        | 0.25        |
| Estimated expenditure level in Dec 07                                         | -0.13  | -0.19  | -0.07  | 0.85        | 2.06   | 8.77   | 0.98                  | 2.25        | 8.83        |
| Comparison of annual change in expenditures between 12/05-12/06 vs 1/04-12/05 | -0.03  | -0.05  | -0.02  | 0.23        | 0.83   | 3.12   | 0.26                  | 0.88        | 3.14        |
| Comparison of annual change in expenditures between 12/06-12/07 vs 1/04-12/05 | -0.03  | -0.05  | -0.02  | -0.03       | 0.47   | 2.97   | 0.01                  | 0.52        | 2.99        |
| Difference between two groups in spending changes pre- and post- Part D       |        |        |        |             |        |        | <b>0.27</b>           | <b>0.19</b> | <b>0.35</b> |

  

| Comparing \$150 and No Cap Groups                                             | No Cap |        |        | \$150 Cap |        |        | \$150 vs No Cap |             |             |
|-------------------------------------------------------------------------------|--------|--------|--------|-----------|--------|--------|-----------------|-------------|-------------|
|                                                                               | No Cap | 95% CI | 95% CI | \$150 Cap | 95% CI | 95% CI | \$150 vs No Cap | 95% CI      | 95% CI      |
| Estimated expenditure level in Jan 04                                         | 1.1    | 1.09   | 1.20   | 0.92      | 0.89   | 0.95   | -0.22           | -0.19       | -0.26       |
| Estimated rate of change in expenditures during 2004-2005                     | 0.0    | 0.00   | 0.00   | 0.00      | 0.00   | 0.00   | 0.00            | 0.00        | 0.00        |
| Estimated expenditure level in Dec 05                                         | 1.09   | 1.00   | 1.18   | 0.87      | 0.81   | 0.92   | -0.22           | -0.19       | -0.26       |
| Estimated change in expenditures between Dec 05 and Jan 06                    |        |        |        | 0.14      | 0.07   | 0.22   | 0.14            | 0.07        | 0.22        |
| Estimated rate of change in expenditures during 2006                          | 0.0    | 0.00   | 0.00   | 0.00      | -0.01  | 0.01   | 0.00            | -0.01       | 0.01        |
| Estimated rate of change in expenditures during 2007                          | 0.0    | 0.00   | 0.00   | 0.00      | -0.03  | 0.02   | 0.00            | -0.02       | 0.02        |
| Estimated expenditure level in Dec 07                                         | 1.0    | 0.92   | 1.15   | 0.95      | 0.44   | 1.46   | -0.09           | -0.48       | 0.31        |
| Comparison of annual change in expenditures between 12/05-12/06 vs 1/04-12/05 | 0.0    | -0.04  | -0.01  | 0.09      | -0.09  | 0.28   | 0.12            | -0.05       | 0.29        |
| Comparison of annual change in expenditures between 12/06-12/07 vs 1/04-12/05 | 0.0    | -0.04  | -0.01  | -0.04     | -0.31  | 0.24   | -0.01           | -0.27       | 0.26        |
| Difference between two groups in spending changes pre- and post- Part D       |        |        |        |           |        |        | <b>0.11</b>     | <b>0.03</b> | <b>0.19</b> |

  

| Comparing \$350 and No Cap Groups                                             | No Cap |        |        | \$350 Cap |        |        | \$350 vs No Cap |              |             |
|-------------------------------------------------------------------------------|--------|--------|--------|-----------|--------|--------|-----------------|--------------|-------------|
|                                                                               | No Cap | 95% CI | 95% CI | \$350 Cap | 95% CI | 95% CI | \$350 vs No Cap | 95% CI       | 95% CI      |
| Estimated expenditure level in Jan 04                                         | 1.16   | 1.10   | 1.21   | 0.95      | 0.92   | 0.97   | -0.21           | -0.18        | -0.24       |
| Estimated rate of change in expenditures during 2004-2005                     | 0.00   | 0.00   | 0.00   | 0.00      | 0.00   | 0.00   | 0.00            | 0.00         | 0.00        |
| Estimated expenditure level in Dec 05                                         | 1.09   | 1.01   | 1.18   | 0.88      | 0.83   | 0.94   | -0.21           | -0.18        | -0.24       |
| Estimated change in expenditures between Dec 05 and Jan 06                    |        |        |        | 0.13      | 0.05   | 0.20   | 0.13            | 0.05         | 0.20        |
| Estimated rate of change in expenditures during 2006                          | 0.00   | 0.00   | 0.00   | -0.01     | -0.02  | 0.00   | -0.01           | -0.01        | 0.00        |
| Estimated rate of change in expenditures during 2007                          | 0.00   | 0.00   | 0.00   | -0.01     | -0.03  | 0.02   | 0.00            | -0.03        | 0.02        |
| Estimated expenditure level in Dec 07                                         | 1.03   | 0.92   | 1.14   | 0.85      | 0.35   | 1.36   | -0.18           | -0.57        | 0.21        |
| Comparison of annual change in expenditures between 12/05-12/06 vs 1/04-12/05 | -0.03  | -0.04  | -0.02  | 0.02      | -0.16  | 0.21   | 0.05            | 0.00         | 0.00        |
| Comparison of annual change in expenditures between 12/06-12/07 vs 1/04-12/05 | -0.03  | -0.04  | -0.02  | -0.08     | -0.36  | 0.19   | -0.05           | 0.00         | 0.00        |
| Difference between two groups in spending changes pre- and post- Part D       |        |        |        |           |        |        | <b>0.00</b>     | <b>-0.07</b> | <b>0.08</b> |

Table A4: The impact of Part D on non-drug medical spending

| Comparing No Coverage and No Cap Groups                                       | No Cap |        |        | No Coverage |        |        | No Coverage vs No Cap |               |               |
|-------------------------------------------------------------------------------|--------|--------|--------|-------------|--------|--------|-----------------------|---------------|---------------|
|                                                                               | No Cap | 95% CI | 95% CI | No Coverage | 95% CI | 95% CI | vs No Cap             | 95% CI        | 95% CI        |
| Estimated expenditure level in Jan 04                                         | 380.10 | 364.20 | 396.50 | 380.10      | 364.20 | 396.50 | 0.00                  | 0.00          | 0.00          |
| Estimated rate of change in expenditures during 2004-2005                     | 4.98   | 4.82   | 5.14   | 4.98        | 4.82   | 5.14   | 0.00                  | 0.00          | 0.00          |
| Estimated expenditure level in Dec 05                                         | 499.56 | 479.82 | 519.80 | 499.56      | 479.82 | 519.80 | 0.00                  | 0.00          | 0.00          |
| Estimated rate of change in expenditures during 2006                          | 4.98   | 4.82   | 5.14   | 3.60        | 3.28   | 3.93   | -1.37                 | -1.54         | -1.21         |
| Estimated rate of change in expenditures during 2007                          | 4.98   | 4.82   | 5.14   | 3.60        | 3.28   | 3.93   | -1.37                 | -1.54         | -1.21         |
| Estimated expenditure level in Dec 07                                         | 619.02 | 595.43 | 643.10 | 586.07      | 558.50 | 614.15 | -32.94                | -36.93        | -28.96        |
| Comparison of annual change in expenditures between 12/05-12/06 vs 1/04-12/05 | 59.73  | 57.81  | 61.65  | 43.26       | 39.34  | 47.17  | -16.47                | -18.47        | -14.48        |
| Comparison of annual change in expenditures between 12/06-12/07 vs 1/04-12/05 | 59.73  | 57.81  | 61.65  | 43.26       | 39.34  | 47.17  | -16.47                | -18.47        | -14.48        |
| Difference between two groups in spending changes pre- and post- Part D       |        |        |        |             |        |        | <b>-32.94</b>         | <b>-36.93</b> | <b>-28.96</b> |

| Comparing \$150 and No Cap Groups                                             | No Cap |        |        | \$150 Cap |        |        | \$150 vs No Cap |               |               |
|-------------------------------------------------------------------------------|--------|--------|--------|-----------|--------|--------|-----------------|---------------|---------------|
|                                                                               | No Cap | 95% CI | 95% CI | \$150 Cap | 95% CI | 95% CI | Cap             | 95% CI        | 95% CI        |
| Estimated expenditure level in Jan 04                                         | 381.60 | 358.86 | 404.21 | 381.60    | 358.86 | 404.21 | 0.00            | 0.00          | 0.00          |
| Estimated rate of change in expenditures during 2004-2005                     | 5.05   | 4.78   | 5.33   | 5.05      | 4.78   | 5.33   | 0.00            | 0.00          | 0.00          |
| Estimated expenditure level in Dec 05                                         | 502.89 | 473.57 | 532.08 | 502.89    | 473.57 | 532.08 | 0.00            | 0.00          | 0.00          |
| Estimated rate of change in expenditures during 2006                          | 5.05   | 4.78   | 5.33   | 3.12      | 2.14   | 4.11   | -1.93           | -2.64         | -1.22         |
| Estimated rate of change in expenditures during 2007                          | 5.05   | 4.78   | 5.33   | 3.12      | 2.14   | 4.11   | -1.93           | -2.64         | -1.22         |
| Estimated expenditure level in Dec 07                                         | 624.18 | 588.28 | 659.96 | 577.88    | 524.91 | 630.72 | -46.30          | -63.37        | -29.23        |
| Comparison of annual change in expenditures between 12/05-12/06 vs 1/04-12/05 | 60.65  | 57.35  | 63.94  | 37.50     | 25.67  | 49.32  | -23.15          | -31.68        | -14.62        |
| Comparison of annual change in expenditures between 12/06-12/07 vs 1/04-12/05 | 60.65  | 57.35  | 63.94  | 37.50     | 25.67  | 49.32  | -23.15          | -31.68        | -14.62        |
| Difference between two groups in spending changes pre- and post- Part D       |        |        |        |           |        |        | <b>-46.30</b>   | <b>-63.37</b> | <b>-29.23</b> |

| Comparing \$350 and No Cap Groups                                             | No Cap |        |        | \$350 Cap |        |        | \$350 vs No Cap |              |              |
|-------------------------------------------------------------------------------|--------|--------|--------|-----------|--------|--------|-----------------|--------------|--------------|
|                                                                               | No Cap | 95% CI | 95% CI | \$350 Cap | 95% CI | 95% CI | Cap             | 95% CI       | 95% CI       |
| Estimated expenditure level in Jan 04                                         | 398.92 | 391.76 | 406.08 | 398.92    | 391.76 | 406.08 | 0.00            | 0.00         | 0.00         |
| Estimated rate of change in expenditures during 2004-2005                     | 4.83   | 4.55   | 5.10   | 4.83      | 4.55   | 5.10   | 0.00            | 0.00         | 0.00         |
| Estimated expenditure level in Dec 05                                         | 514.74 | 500.95 | 528.53 | 514.74    | 500.95 | 528.53 | 0.00            | 0.00         | 0.00         |
| Estimated rate of change in expenditures during 2006                          | 4.83   | 4.55   | 5.10   | 6.09      | 5.57   | 6.61   | 1.27            | 1.02         | 1.51         |
| Estimated rate of change in expenditures during 2007                          | 4.83   | 4.55   | 5.10   | 6.09      | 5.57   | 6.61   | 1.27            | 1.02         | 1.51         |
| Estimated expenditure level in Dec 07                                         | 630.57 | 610.14 | 650.99 | 776.83    | 743.91 | 809.74 | 146.26          | 133.77       | 158.75       |
| Comparison of annual change in expenditures between 12/05-12/06 vs 1/04-12/05 | 57.91  | 54.60  | 61.23  | 73.13     | 66.88  | 79.37  | 15.22           | 12.29        | 18.15        |
| Comparison of annual change in expenditures between 12/06-12/07 vs 1/04-12/05 | 57.91  | 54.60  | 61.23  | 73.13     | 66.88  | 79.37  | 15.22           | 12.29        | 18.15        |
| Difference between two groups in spending changes pre- and post- Part D       |        |        |        |           |        |        | <b>30.43</b>    | <b>24.57</b> | <b>36.29</b> |

Note: We tested for first order serial correlation but could not reject the null hypothesis of no serial correlation. The results are for our three comparisons: No Coverage group:  $\rho = 0.0096$  (p-value=0.95); \$150 Cap group:  $\rho = -0.124$  (p-value=0.43); and \$350 Cap group:  $\rho = -0.29$  (p-value=0.067). Standard errors are empirical or robust standard errors.
